# Supplementary material for: Observed to expected or logistic regression to identify hospitals with high or low 30-day mortality?
Source: PLoS One. 2018 Apr 13;13(4):e0195248. doi: 10.1371/journal.pone.0195248 (PMC5898724; doi:10.1371/journal.pone.0195248)
Supplement: S1 Table — (XLSX) [file pone.0195248.s004.xlsx]

## Sheet: S1 Table
S1 Table. Results from simulation study when testing for low mortality outlier hospitals: mean and range for actual level of significance, power, and directional error; per method for the three mortality sets and number of hospitals compared, across scenarios A-J per hospital size.
OE=the ratio of observed to expected number of deaths; OE-Faris=variance corrected OE; LR=logistic regression; LR-Firth=LR with bias correction; LR 5%, 10% and 25% trim.=trimmed mean variants of LR; LR-Firth 5%, 10%, and 25% trim.=trimmed mean variants of LR-Firth; excl. 0-deaths=excluding hospitals with no deaths.
Hospital mortality set	Number of hospitals compared	Method	Large hospitals, actual level of significance	Medium hospitals, actual level of significance	Small hospitals, actual level of significance	Large hospitals, power	Medium hospitals, power	Small hospitals, power	Large hospitals, directional error high to low mortality outlier	Medium hospitals, directional error high to low mortality outlier	Small hospitals, directional error high to low mortality outlier
Low mortality set	N=10	OE	0.084 (0.027-0.188)	0.066 (0.033-0.138)	0.036 (0.027-0.058)	0.763 (0.751-0.788)	0.557 (0.557-0.557)	0.147 (0.114-0.182)	0.000 (0.000-0.000)	0.000 (0.000-0.001)	0.005 (0.003-0.009)
Low mortality set	N=20	OE	0.069 (0.035-0.110)	0.061 (0.038-0.090)	0.032 (0.026-0.040)	0.716 (0.704-0.733)	0.512 (0.512-0.512)	0.119 (0.099-0.139)	0.000 (0.000-0.000)	0.000 (0.000-0.001)	0.005 (0.003-0.007)
Low mortality set	N=50	OE	0.065 (0.043-0.124)	0.058 (0.041-0.096)	0.028 (0.025-0.040)	0.696 (0.685-0.710)	0.490 (0.490-0.490)	0.099 (0.093-0.101)	0.000 (0.000-0.000)	0.000 (0.000-0.001)	0.004 (0.003-0.005)
Low mortality set	N=100	OE	0.064 (0.044-0.164)	0.057 (0.042-0.123)	0.028 (0.025-0.050)	0.681 (0.677-0.688)	0.475 (0.475-0.475)	0.092 (0.090-0.094)	0.000 (0.000-0.000)	0.000 (0.000-0.001)	0.004 (0.003-0.004)
Low mortality set	N=10	OE-Faris	0.121 (0.044-0.255)	0.083 (0.043-0.168)	0.037 (0.028-0.061)	0.830 (0.819-0.849)	0.608 (0.608-0.608)	0.152 (0.117-0.188)	0.000 (0.000-0.000)	0.001 (0.000-0.002)	0.006 (0.003-0.010)
Low mortality set	N=20	OE-Faris	0.086 (0.045-0.134)	0.070 (0.043-0.102)	0.032 (0.026-0.042)	0.757 (0.744-0.773)	0.538 (0.538-0.538)	0.121 (0.100-0.142)	0.000 (0.000-0.000)	0.001 (0.000-0.001)	0.005 (0.003-0.007)
Low mortality set	N=50	OE-Faris	0.071 (0.047-0.135)	0.061 (0.044-0.101)	0.029 (0.025-0.040)	0.715 (0.704-0.730)	0.503 (0.503-0.503)	0.099 (0.093-0.102)	0.000 (0.000-0.000)	0.000 (0.000-0.001)	0.004 (0.003-0.005)
Low mortality set	N=100	OE-Faris	0.067 (0.046-0.170)	0.059 (0.043-0.126)	0.028 (0.025-0.050)	0.690 (0.685-0.697)	0.481 (0.481-0.481)	0.092 (0.091-0.094)	0.000 (0.000-0.000)	0.000 (0.000-0.001)	0.004 (0.003-0.004)
Low mortality set	N=10	LR	0.039 (0.025-0.064)	0.033 (0.023-0.060)	0.001 (0.000-0.002)	0.415 (0.400-0.429)	0.324 (0.324-0.324)	0.004 (0.002-0.005)	0.000 (0.000-0.000)	0.000 (0.000-0.000)	0.000 (0.000-0.000)
Low mortality set	N=20	LR	0.026 (0.016-0.067)	0.026 (0.018-0.055)	0.000 (0.000-0.001)	0.369 (0.365-0.375)	0.265 (0.265-0.265)	0.000 (0.000-0.001)	0.000 (0.000-0.000)	0.000 (0.000-0.000)	0.000 (0.000-0.000)
Low mortality set	N=50	LR	0.015 (0.009-0.046)	0.015 (0.010-0.040)	0.000 (0.000-0.000)	0.230 (0.228-0.232)	0.159 (0.159-0.159)	0.000 (0.000-0.000)	0.000 (0.000-0.000)	0.000 (0.000-0.000)	0.000 (0.000-0.000)
Low mortality set	N=100	LR	0.008 (0.005-0.025)	0.008 (0.006-0.021)	0.000 (0.000-0.000)	0.131 (0.121-0.140)	0.088 (0.088-0.088)	0.000 (0.000-0.000)	0.000 (0.000-0.000)	0.000 (0.000-0.000)	0.000 (0.000-0.000)
Low mortality set	N=10	LR 5% trim.	0.039 (0.025-0.064)	0.033 (0.023-0.060)	0.001 (0.000-0.002)	0.415 (0.400-0.429)	0.324 (0.324-0.324)	0.004 (0.002-0.005)	0.000 (0.000-0.000)	0.000 (0.000-0.000)	0.000 (0.000-0.000)
Low mortality set	N=20	LR 5% trim.	0.029 (0.019-0.069)	0.028 (0.021-0.057)	0.000 (0.000-0.002)	0.389 (0.383-0.397)	0.280 (0.280-0.280)	0.001 (0.001-0.002)	0.000 (0.000-0.000)	0.000 (0.000-0.000)	0.000 (0.000-0.000)
Low mortality set	N=50	LR 5% trim.	0.017 (0.010-0.051)	0.017 (0.011-0.043)	0.000 (0.000-0.000)	0.244 (0.242-0.247)	0.169 (0.169-0.169)	0.000 (0.000-0.000)	0.000 (0.000-0.000)	0.000 (0.000-0.000)	0.000 (0.000-0.000)
Low mortality set	N=100	LR 5% trim.	0.010 (0.006-0.028)	0.010 (0.007-0.024)	0.000 (0.000-0.000)	0.141 (0.129-0.151)	0.096 (0.096-0.096)	0.000 (0.000-0.000)	0.000 (0.000-0.000)	0.000 (0.000-0.000)	0.000 (0.000-0.000)
Low mortality set	N=10	LR 10% trim.	0.041 (0.025-0.059)	0.035 (0.026-0.057)	0.003 (0.002-0.008)	0.441 (0.421-0.453)	0.345 (0.345-0.345)	0.013 (0.010-0.018)	0.000 (0.000-0.000)	0.000 (0.000-0.000)	0.000 (0.000-0.000)
Low mortality set	N=20	LR 10% trim.	0.031 (0.020-0.068)	0.029 (0.022-0.056)	0.001 (0.000-0.002)	0.401 (0.397-0.408)	0.288 (0.288-0.288)	0.002 (0.001-0.003)	0.000 (0.000-0.000)	0.000 (0.000-0.000)	0.000 (0.000-0.000)
Low mortality set	N=50	LR 10% trim.	0.019 (0.012-0.053)	0.018 (0.013-0.044)	0.000 (0.000-0.000)	0.259 (0.256-0.262)	0.180 (0.180-0.180)	0.000 (0.000-0.000)	0.000 (0.000-0.000)	0.000 (0.000-0.000)	0.000 (0.000-0.000)
Low mortality set	N=100	LR 10% trim.	0.011 (0.007-0.028)	0.011 (0.007-0.024)	0.000 (0.000-0.000)	0.145 (0.132-0.156)	0.101 (0.101-0.101)	0.000 (0.000-0.000)	0.000 (0.000-0.000)	0.000 (0.000-0.000)	0.000 (0.000-0.000)
Low mortality set	N=10	LR 25% trim.	0.040 (0.026-0.055)	0.037 (0.028-0.056)	0.005 (0.003-0.008)	0.447 (0.428-0.460)	0.352 (0.352-0.352)	0.018 (0.014-0.023)	0.000 (0.000-0.000)	0.000 (0.000-0.000)	0.000 (0.000-0.001)
Low mortality set	N=20	LR 25% trim.	0.033 (0.023-0.063)	0.032 (0.025-0.055)	0.001 (0.000-0.002)	0.418 (0.412-0.425)	0.306 (0.306-0.306)	0.003 (0.001-0.005)	0.000 (0.000-0.000)	0.000 (0.000-0.000)	0.000 (0.000-0.000)
Low mortality set	N=50	LR 25% trim.	0.021 (0.014-0.050)	0.020 (0.015-0.043)	0.000 (0.000-0.000)	0.271 (0.269-0.274)	0.192 (0.192-0.192)	0.000 (0.000-0.000)	0.000 (0.000-0.000)	0.000 (0.000-0.000)	0.000 (0.000-0.000)
Low mortality set	N=100	LR 25% trim.	0.012 (0.008-0.027)	0.012 (0.008-0.023)	0.000 (0.000-0.000)	0.153 (0.139-0.164)	0.107 (0.107-0.107)	0.000 (0.000-0.000)	0.000 (0.000-0.000)	0.000 (0.000-0.000)	0.000 (0.000-0.000)
Low mortality set	N=10	LR-Firth	0.066 (0.044-0.100)	0.049 (0.036-0.081)	0.001 (0.000-0.002)	0.552 (0.545-0.562)	0.413 (0.413-0.413)	0.006 (0.005-0.008)	0.000 (0.000-0.000)	0.000 (0.000-0.000)	0.000 (0.000-0.000)
Low mortality set	N=20	LR-Firth	0.055 (0.039-0.117)	0.045 (0.035-0.084)	0.000 (0.000-0.001)	0.573 (0.571-0.575)	0.398 (0.398-0.398)	0.002 (0.001-0.003)	0.000 (0.000-0.000)	0.000 (0.000-0.000)	0.000 (0.000-0.000)
Low mortality set	N=50	LR-Firth	0.050 (0.037-0.118)	0.041 (0.032-0.086)	0.000 (0.000-0.001)	0.597 (0.593-0.601)	0.392 (0.392-0.392)	0.000 (0.000-0.000)	0.000 (0.000-0.000)	0.000 (0.000-0.000)	0.000 (0.000-0.000)
Low mortality set	N=100	LR-Firth	0.048 (0.036-0.093)	0.040 (0.032-0.068)	0.000 (0.000-0.000)	0.612 (0.608-0.616)	0.396 (0.396-0.396)	0.000 (0.000-0.000)	0.000 (0.000-0.000)	0.000 (0.000-0.000)	0.000 (0.000-0.000)
Low mortality set	N=10	LR-Firth 5% trim.	0.066 (0.044-0.100)	0.049 (0.036-0.081)	0.001 (0.000-0.002)	0.552 (0.545-0.562)	0.413 (0.413-0.413)	0.006 (0.005-0.008)	0.000 (0.000-0.000)	0.000 (0.000-0.000)	0.000 (0.000-0.000)
Low mortality set	N=20	LR-Firth 5% trim.	0.061 (0.043-0.120)	0.049 (0.038-0.086)	0.001 (0.001-0.004)	0.610 (0.609-0.610)	0.426 (0.426-0.426)	0.006 (0.004-0.011)	0.000 (0.000-0.000)	0.000 (0.000-0.000)	0.000 (0.000-0.000)
Low mortality set	N=50	LR-Firth 5% trim.	0.060 (0.045-0.130)	0.048 (0.037-0.093)	0.000 (0.000-0.001)	0.641 (0.637-0.643)	0.425 (0.425-0.425)	0.000 (0.000-0.000)	0.000 (0.000-0.000)	0.000 (0.000-0.000)	0.000 (0.000-0.000)
Low mortality set	N=100	LR-Firth 5% trim.	0.059 (0.045-0.104)	0.047 (0.038-0.076)	0.000 (0.000-0.000)	0.658 (0.652-0.662)	0.432 (0.432-0.432)	0.000 (0.000-0.000)	0.000 (0.000-0.000)	0.000 (0.000-0.000)	0.000 (0.000-0.000)
Low mortality set	N=10	LR-Firth 10% trim.	0.066 (0.042-0.089)	0.050 (0.037-0.075)	0.006 (0.004-0.011)	0.586 (0.579-0.590)	0.435 (0.435-0.435)	0.032 (0.027-0.041)	0.000 (0.000-0.000)	0.000 (0.000-0.000)	0.000 (0.000-0.001)
Low mortality set	N=20	LR-Firth 10% trim.	0.063 (0.044-0.116)	0.050 (0.039-0.084)	0.002 (0.001-0.004)	0.623 (0.622-0.624)	0.436 (0.436-0.436)	0.008 (0.005-0.013)	0.000 (0.000-0.000)	0.000 (0.000-0.000)	0.000 (0.000-0.000)
Low mortality set	N=50	LR-Firth 10% trim.	0.065 (0.048-0.130)	0.051 (0.040-0.092)	0.000 (0.000-0.001)	0.663 (0.658-0.667)	0.444 (0.444-0.444)	0.001 (0.000-0.001)	0.000 (0.000-0.000)	0.000 (0.000-0.000)	0.000 (0.000-0.000)
Low mortality set	N=100	LR-Firth 10% trim.	0.063 (0.049-0.113)	0.049 (0.040-0.082)	0.000 (0.000-0.000)	0.673 (0.669-0.676)	0.444 (0.444-0.444)	0.000 (0.000-0.000)	0.000 (0.000-0.000)	0.000 (0.000-0.000)	0.000 (0.000-0.000)
Low mortality set	N=10	LR-Firth 25% trim.	0.065 (0.042-0.080)	0.052 (0.039-0.071)	0.008 (0.006-0.011)	0.591 (0.584-0.595)	0.445 (0.445-0.445)	0.040 (0.033-0.048)	0.000 (0.000-0.000)	0.000 (0.000-0.000)	0.001 (0.000-0.001)
Low mortality set	N=20	LR-Firth 25% trim.	0.064 (0.047-0.102)	0.053 (0.042-0.078)	0.002 (0.001-0.004)	0.633 (0.631-0.635)	0.458 (0.458-0.458)	0.010 (0.007-0.016)	0.000 (0.000-0.000)	0.000 (0.000-0.000)	0.000 (0.000-0.000)
Low mortality set	N=50	LR-Firth 25% trim.	0.067 (0.052-0.119)	0.054 (0.044-0.087)	0.000 (0.000-0.001)	0.677 (0.673-0.681)	0.462 (0.462-0.462)	0.001 (0.000-0.001)	0.000 (0.000-0.000)	0.000 (0.000-0.000)	0.000 (0.000-0.000)
Low mortality set	N=100	LR-Firth 25% trim.	0.066 (0.052-0.123)	0.052 (0.043-0.088)	0.000 (0.000-0.000)	0.686 (0.684-0.688)	0.458 (0.458-0.458)	0.000 (0.000-0.000)	0.000 (0.000-0.000)	0.000 (0.000-0.001)	0.000 (0.000-0.000)
Low mortality set	N=10	LR, excl. 0-deaths	0.046 (0.028-0.070)	0.039 (0.028-0.065)	0.001 (0.000-0.002)	0.480 (0.471-0.488)	0.364 (0.364-0.364)	0.005 (0.004-0.006)	0.000 (0.000-0.000)	0.000 (0.000-0.000)	0.000 (0.000-0.000)
Low mortality set	N=20	LR, excl. 0-deaths	0.035 (0.023-0.079)	0.034 (0.026-0.065)	0.000 (0.000-0.001)	0.489 (0.482-0.498)	0.352 (0.352-0.352)	0.001 (0.000-0.001)	0.000 (0.000-0.000)	0.000 (0.000-0.000)	0.000 (0.000-0.000)
Low mortality set	N=50	LR, excl. 0-deaths	0.030 (0.021-0.075)	0.030 (0.023-0.064)	0.000 (0.000-0.000)	0.495 (0.493-0.497)	0.332 (0.332-0.332)	0.000 (0.000-0.000)	0.000 (0.000-0.000)	0.000 (0.000-0.000)	0.000 (0.000-0.000)
Low mortality set	N=100	LR, excl. 0-deaths	0.029 (0.021-0.058)	0.030 (0.024-0.053)	0.000 (0.000-0.000)	0.517 (0.516-0.518)	0.343 (0.343-0.343)	0.000 (0.000-0.000)	0.000 (0.000-0.000)	0.000 (0.000-0.000)	0.000 (0.000-0.000)
Low mortality set	N=10	LR 5% trim., excl. 0-deaths	0.046 (0.028-0.070)	0.039 (0.028-0.065)	0.001 (0.000-0.002)	0.480 (0.471-0.488)	0.364 (0.364-0.364)	0.005 (0.004-0.006)	0.000 (0.000-0.000)	0.000 (0.000-0.000)	0.000 (0.000-0.000)
Low mortality set	N=20	LR 5% trim., excl. 0-deaths	0.038 (0.025-0.081)	0.036 (0.028-0.067)	0.000 (0.000-0.002)	0.509 (0.502-0.515)	0.366 (0.366-0.366)	0.002 (0.001-0.003)	0.000 (0.000-0.000)	0.000 (0.000-0.000)	0.000 (0.000-0.000)
Low mortality set	N=50	LR 5% trim., excl. 0-deaths	0.034 (0.024-0.082)	0.034 (0.026-0.069)	0.000 (0.000-0.000)	0.524 (0.522-0.528)	0.355 (0.355-0.355)	0.000 (0.000-0.000)	0.000 (0.000-0.000)	0.000 (0.000-0.000)	0.000 (0.000-0.000)
Low mortality set	N=100	LR 5% trim., excl. 0-deaths	0.035 (0.025-0.065)	0.035 (0.027-0.057)	0.000 (0.000-0.000)	0.552 (0.552-0.553)	0.371 (0.371-0.371)	0.000 (0.000-0.000)	0.000 (0.000-0.000)	0.000 (0.000-0.000)	0.000 (0.000-0.000)
Low mortality set	N=10	LR 10% trim., excl. 0-deaths	0.048 (0.029-0.065)	0.041 (0.030-0.062)	0.004 (0.002-0.008)	0.505 (0.502-0.508)	0.386 (0.386-0.386)	0.015 (0.011-0.021)	0.000 (0.000-0.000)	0.000 (0.000-0.000)	0.000 (0.000-0.001)
Low mortality set	N=20	LR 10% trim., excl. 0-deaths	0.041 (0.028-0.080)	0.039 (0.030-0.067)	0.001 (0.000-0.003)	0.529 (0.524-0.535)	0.379 (0.379-0.379)	0.002 (0.001-0.005)	0.000 (0.000-0.000)	0.000 (0.000-0.000)	0.000 (0.000-0.000)
Low mortality set	N=50	LR 10% trim., excl. 0-deaths	0.038 (0.027-0.085)	0.037 (0.028-0.071)	0.000 (0.000-0.000)	0.552 (0.549-0.556)	0.375 (0.375-0.375)	0.000 (0.000-0.000)	0.000 (0.000-0.000)	0.000 (0.000-0.000)	0.000 (0.000-0.000)
Low mortality set	N=100	LR 10% trim., excl. 0-deaths	0.039 (0.028-0.074)	0.038 (0.030-0.062)	0.000 (0.000-0.000)	0.576 (0.575-0.577)	0.389 (0.389-0.389)	0.000 (0.000-0.000)	0.000 (0.000-0.000)	0.000 (0.000-0.000)	0.000 (0.000-0.000)
Low mortality set	N=10	LR 25% trim., excl. 0-deaths	0.048 (0.029-0.059)	0.043 (0.033-0.060)	0.006 (0.003-0.009)	0.516 (0.512-0.518)	0.395 (0.395-0.395)	0.026 (0.017-0.031)	0.000 (0.000-0.000)	0.000 (0.000-0.000)	0.000 (0.000-0.001)
Low mortality set	N=20	LR 25% trim., excl. 0-deaths	0.044 (0.031-0.073)	0.042 (0.034-0.065)	0.001 (0.000-0.003)	0.551 (0.546-0.557)	0.405 (0.405-0.405)	0.004 (0.002-0.007)	0.000 (0.000-0.000)	0.000 (0.000-0.000)	0.000 (0.000-0.000)
Low mortality set	N=50	LR 25% trim., excl. 0-deaths	0.043 (0.032-0.081)	0.041 (0.033-0.070)	0.000 (0.000-0.000)	0.583 (0.580-0.589)	0.403 (0.403-0.403)	0.000 (0.000-0.000)	0.000 (0.000-0.000)	0.000 (0.000-0.000)	0.000 (0.000-0.000)
Low mortality set	N=100	LR 25% trim., excl. 0-deaths	0.044 (0.033-0.084)	0.042 (0.035-0.071)	0.000 (0.000-0.000)	0.609 (0.608-0.610)	0.415 (0.415-0.415)	0.000 (0.000-0.000)	0.000 (0.000-0.000)	0.000 (0.000-0.000)	0.000 (0.000-0.000)
Low mortality set	N=10	LR-Firth, excl. 0-deaths	0.077 (0.050-0.109)	0.057 (0.041-0.087)	0.000 (0.000-0.001)	0.611 (0.602-0.620)	0.448 (0.448-0.448)	0.001 (0.001-0.002)	0.000 (0.000-0.000)	0.000 (0.000-0.001)	0.000 (0.000-0.000)
Low mortality set	N=20	LR-Firth, excl. 0-deaths	0.067 (0.048-0.130)	0.053 (0.041-0.094)	0.000 (0.000-0.000)	0.635 (0.629-0.644)	0.444 (0.444-0.444)	0.000 (0.000-0.000)	0.000 (0.000-0.000)	0.000 (0.000-0.001)	0.000 (0.000-0.000)
Low mortality set	N=50	LR-Firth, excl. 0-deaths	0.066 (0.049-0.140)	0.051 (0.040-0.099)	0.000 (0.000-0.000)	0.664 (0.657-0.671)	0.443 (0.443-0.443)	0.000 (0.000-0.000)	0.000 (0.000-0.000)	0.000 (0.000-0.000)	0.000 (0.000-0.000)
Low mortality set	N=100	LR-Firth, excl. 0-deaths	0.062 (0.047-0.110)	0.049 (0.040-0.079)	0.000 (0.000-0.000)	0.669 (0.668-0.669)	0.442 (0.442-0.442)	0.000 (0.000-0.000)	0.000 (0.000-0.000)	0.000 (0.000-0.000)	0.000 (0.000-0.000)
Low mortality set	N=10	LR-Firth 5% trim., excl. 0-deaths	0.077 (0.050-0.109)	0.057 (0.041-0.087)	0.000 (0.000-0.001)	0.611 (0.602-0.620)	0.448 (0.448-0.448)	0.001 (0.001-0.002)	0.000 (0.000-0.000)	0.000 (0.000-0.001)	0.000 (0.000-0.000)
Low mortality set	N=20	LR-Firth 5% trim., excl. 0-deaths	0.069 (0.049-0.128)	0.054 (0.042-0.092)	0.000 (0.000-0.001)	0.643 (0.639-0.649)	0.451 (0.451-0.451)	0.000 (0.000-0.001)	0.000 (0.000-0.000)	0.000 (0.000-0.000)	0.000 (0.000-0.000)
Low mortality set	N=50	LR-Firth 5% trim., excl. 0-deaths	0.070 (0.053-0.142)	0.054 (0.042-0.100)	0.000 (0.000-0.000)	0.675 (0.669-0.680)	0.454 (0.454-0.454)	0.000 (0.000-0.000)	0.000 (0.000-0.000)	0.000 (0.000-0.000)	0.000 (0.000-0.000)
Low mortality set	N=100	LR-Firth 5% trim., excl. 0-deaths	0.067 (0.051-0.116)	0.052 (0.042-0.083)	0.000 (0.000-0.000)	0.682 (0.681-0.684)	0.453 (0.453-0.453)	0.000 (0.000-0.000)	0.000 (0.000-0.000)	0.000 (0.000-0.000)	0.000 (0.000-0.000)
Low mortality set	N=10	LR-Firth 10% trim., excl. 0-deaths	0.075 (0.047-0.096)	0.056 (0.041-0.079)	0.001 (0.000-0.002)	0.621 (0.618-0.623)	0.457 (0.457-0.457)	0.005 (0.004-0.006)	0.000 (0.000-0.000)	0.000 (0.000-0.001)	0.000 (0.000-0.000)
Low mortality set	N=20	LR-Firth 10% trim., excl. 0-deaths	0.070 (0.049-0.123)	0.055 (0.042-0.089)	0.000 (0.000-0.001)	0.650 (0.646-0.654)	0.459 (0.459-0.459)	0.000 (0.000-0.001)	0.000 (0.000-0.000)	0.000 (0.000-0.001)	0.000 (0.000-0.000)
Low mortality set	N=50	LR-Firth 10% trim., excl. 0-deaths	0.072 (0.055-0.139)	0.056 (0.044-0.098)	0.000 (0.000-0.000)	0.686 (0.679-0.690)	0.464 (0.464-0.464)	0.000 (0.000-0.000)	0.000 (0.000-0.000)	0.000 (0.000-0.000)	0.000 (0.000-0.000)
Low mortality set	N=100	LR-Firth 10% trim., excl. 0-deaths	0.069 (0.053-0.124)	0.053 (0.043-0.088)	0.000 (0.000-0.000)	0.690 (0.689-0.692)	0.461 (0.461-0.461)	0.000 (0.000-0.000)	0.000 (0.000-0.000)	0.000 (0.000-0.001)	0.000 (0.000-0.000)
Low mortality set	N=10	LR-Firth 25%, excl. 0-deaths	0.073 (0.046-0.084)	0.058 (0.043-0.074)	0.001 (0.001-0.002)	0.622 (0.620-0.626)	0.467 (0.467-0.467)	0.008 (0.006-0.009)	0.000 (0.000-0.000)	0.000 (0.000-0.001)	0.000 (0.000-0.000)
Low mortality set	N=20	LR-Firth 25%, excl. 0-deaths	0.071 (0.051-0.108)	0.057 (0.045-0.081)	0.000 (0.000-0.000)	0.657 (0.653-0.659)	0.474 (0.474-0.474)	0.001 (0.000-0.001)	0.000 (0.000-0.000)	0.000 (0.000-0.001)	0.000 (0.000-0.000)
Low mortality set	N=50	LR-Firth 25%, excl. 0-deaths	0.074 (0.057-0.126)	0.058 (0.047-0.091)	0.000 (0.000-0.000)	0.697 (0.692-0.700)	0.479 (0.479-0.479)	0.000 (0.000-0.000)	0.000 (0.000-0.000)	0.000 (0.000-0.001)	0.000 (0.000-0.000)
Low mortality set	N=100	LR-Firth 25%, excl. 0-deaths	0.071 (0.056-0.132)	0.055 (0.045-0.093)	0.000 (0.000-0.000)	0.699 (0.697-0.700)	0.472 (0.472-0.472)	0.000 (0.000-0.000)	0.000 (0.000-0.000)	0.000 (0.000-0.001)	0.000 (0.000-0.000)
Medium mortality set	N=10	OE	0.068 (0.027-0.137)	0.057 (0.034-0.106)	0.044 (0.036-0.057)	0.619 (0.611-0.633)	0.432 (0.432-0.432)	0.151 (0.125-0.167)	0.000 (0.000-0.000)	0.001 (0.000-0.002)	0.010 (0.007-0.013)
Medium mortality set	N=20	OE	0.061 (0.036-0.094)	0.056 (0.039-0.080)	0.045 (0.039-0.052)	0.592 (0.587-0.596)	0.410 (0.410-0.410)	0.142 (0.126-0.152)	0.000 (0.000-0.000)	0.001 (0.001-0.001)	0.009 (0.007-0.011)
Medium mortality set	N=50	OE	0.059 (0.041-0.103)	0.055 (0.043-0.086)	0.044 (0.040-0.053)	0.576 (0.568-0.583)	0.401 (0.401-0.401)	0.134 (0.128-0.140)	0.000 (0.000-0.000)	0.001 (0.000-0.002)	0.009 (0.008-0.010)
Medium mortality set	N=100	OE	0.060 (0.044-0.132)	0.055 (0.044-0.104)	0.044 (0.040-0.057)	0.560 (0.556-0.564)	0.396 (0.396-0.396)	0.127 (0.122-0.130)	0.000 (0.000-0.000)	0.001 (0.001-0.003)	0.009 (0.008-0.011)
Medium mortality set	N=10	OE-Faris	0.102 (0.045-0.196)	0.072 (0.045-0.130)	0.045 (0.038-0.060)	0.703 (0.695-0.718)	0.484 (0.484-0.484)	0.155 (0.128-0.171)	0.000 (0.000-0.001)	0.001 (0.000-0.003)	0.010 (0.007-0.014)
Medium mortality set	N=20	OE-Faris	0.076 (0.046-0.116)	0.064 (0.045-0.090)	0.046 (0.040-0.053)	0.640 (0.638-0.643)	0.440 (0.440-0.440)	0.144 (0.127-0.154)	0.000 (0.000-0.000)	0.001 (0.001-0.002)	0.010 (0.008-0.012)
Medium mortality set	N=50	OE-Faris	0.065 (0.046-0.113)	0.059 (0.046-0.091)	0.045 (0.040-0.054)	0.598 (0.591-0.604)	0.413 (0.413-0.413)	0.135 (0.129-0.141)	0.000 (0.000-0.000)	0.001 (0.000-0.002)	0.009 (0.008-0.010)
Medium mortality set	N=100	OE-Faris	0.063 (0.046-0.137)	0.057 (0.045-0.106)	0.044 (0.040-0.057)	0.570 (0.566-0.575)	0.401 (0.401-0.401)	0.127 (0.122-0.130)	0.000 (0.000-0.000)	0.001 (0.001-0.003)	0.009 (0.009-0.011)
Medium mortality set	N=10	LR	0.045 (0.030-0.067)	0.040 (0.030-0.062)	0.025 (0.021-0.033)	0.391 (0.389-0.392)	0.306 (0.306-0.306)	0.086 (0.077-0.098)	0.000 (0.000-0.000)	0.000 (0.000-0.001)	0.005 (0.003-0.007)
Medium mortality set	N=20	LR	0.035 (0.025-0.073)	0.034 (0.027-0.062)	0.023 (0.020-0.034)	0.388 (0.385-0.390)	0.282 (0.282-0.282)	0.075 (0.069-0.084)	0.000 (0.000-0.000)	0.001 (0.000-0.001)	0.005 (0.003-0.006)
Medium mortality set	N=50	LR	0.028 (0.020-0.066)	0.030 (0.024-0.059)	0.020 (0.017-0.031)	0.378 (0.378-0.379)	0.265 (0.265-0.265)	0.064 (0.058-0.069)	0.000 (0.000-0.000)	0.000 (0.000-0.001)	0.004 (0.003-0.006)
Medium mortality set	N=100	LR	0.027 (0.021-0.052)	0.028 (0.023-0.048)	0.019 (0.016-0.027)	0.364 (0.356-0.371)	0.264 (0.264-0.264)	0.057 (0.054-0.059)	0.000 (0.000-0.000)	0.000 (0.000-0.001)	0.004 (0.003-0.005)
Medium mortality set	N=10	LR 5% trim.	0.045 (0.030-0.067)	0.040 (0.030-0.062)	0.025 (0.021-0.033)	0.391 (0.389-0.392)	0.306 (0.306-0.306)	0.086 (0.077-0.098)	0.000 (0.000-0.000)	0.000 (0.000-0.001)	0.005 (0.003-0.007)
Medium mortality set	N=20	LR 5% trim.	0.039 (0.029-0.076)	0.038 (0.030-0.065)	0.028 (0.024-0.039)	0.421 (0.416-0.426)	0.302 (0.302-0.302)	0.088 (0.083-0.096)	0.000 (0.000-0.000)	0.001 (0.000-0.001)	0.006 (0.004-0.008)
Medium mortality set	N=50	LR 5% trim.	0.034 (0.025-0.074)	0.034 (0.028-0.065)	0.023 (0.020-0.035)	0.415 (0.413-0.417)	0.289 (0.289-0.289)	0.072 (0.067-0.078)	0.000 (0.000-0.000)	0.001 (0.000-0.001)	0.005 (0.003-0.007)
Medium mortality set	N=100	LR 5% trim.	0.034 (0.026-0.060)	0.034 (0.028-0.053)	0.022 (0.019-0.030)	0.406 (0.399-0.413)	0.292 (0.292-0.292)	0.065 (0.061-0.067)	0.000 (0.000-0.000)	0.000 (0.000-0.001)	0.004 (0.003-0.006)
Medium mortality set	N=10	LR 10% trim.	0.045 (0.030-0.060)	0.041 (0.033-0.058)	0.034 (0.029-0.042)	0.419 (0.417-0.420)	0.324 (0.324-0.324)	0.112 (0.104-0.126)	0.000 (0.000-0.000)	0.001 (0.000-0.001)	0.007 (0.005-0.010)
Medium mortality set	N=20	LR 10% trim.	0.040 (0.029-0.074)	0.039 (0.031-0.064)	0.030 (0.027-0.041)	0.434 (0.429-0.437)	0.313 (0.313-0.313)	0.096 (0.090-0.104)	0.000 (0.000-0.000)	0.001 (0.000-0.001)	0.007 (0.005-0.008)
Medium mortality set	N=50	LR 10% trim.	0.038 (0.028-0.075)	0.037 (0.031-0.065)	0.025 (0.022-0.036)	0.438 (0.435-0.440)	0.304 (0.304-0.304)	0.079 (0.075-0.084)	0.000 (0.000-0.000)	0.001 (0.000-0.001)	0.005 (0.004-0.008)
Medium mortality set	N=100	LR 10% trim.	0.037 (0.029-0.065)	0.036 (0.030-0.055)	0.024 (0.021-0.031)	0.424 (0.417-0.431)	0.303 (0.303-0.303)	0.069 (0.065-0.071)	0.000 (0.000-0.000)	0.001 (0.000-0.001)	0.005 (0.004-0.006)
Medium mortality set	N=10	LR 25% trim.	0.045 (0.030-0.054)	0.043 (0.034-0.057)	0.039 (0.034-0.045)	0.424 (0.420-0.427)	0.330 (0.330-0.330)	0.127 (0.118-0.141)	0.000 (0.000-0.000)	0.001 (0.000-0.001)	0.008 (0.006-0.010)
Medium mortality set	N=20	LR 25% trim.	0.042 (0.030-0.068)	0.043 (0.035-0.062)	0.034 (0.030-0.042)	0.451 (0.445-0.455)	0.330 (0.330-0.330)	0.106 (0.098-0.114)	0.000 (0.000-0.000)	0.001 (0.000-0.001)	0.007 (0.005-0.009)
Medium mortality set	N=50	LR 25% trim.	0.041 (0.031-0.072)	0.041 (0.034-0.064)	0.028 (0.025-0.036)	0.458 (0.454-0.460)	0.319 (0.319-0.319)	0.086 (0.083-0.090)	0.000 (0.000-0.000)	0.001 (0.000-0.001)	0.005 (0.004-0.008)
Medium mortality set	N=100	LR 25% trim.	0.041 (0.032-0.074)	0.040 (0.033-0.062)	0.025 (0.022-0.034)	0.444 (0.436-0.453)	0.320 (0.320-0.320)	0.074 (0.070-0.075)	0.000 (0.000-0.000)	0.001 (0.000-0.001)	0.005 (0.004-0.006)
Medium mortality set	N=10	LR-Firth	0.064 (0.045-0.090)	0.051 (0.042-0.076)	0.019 (0.016-0.024)	0.475 (0.474-0.475)	0.357 (0.357-0.357)	0.072 (0.065-0.082)	0.000 (0.000-0.001)	0.001 (0.001-0.001)	0.003 (0.001-0.005)
Medium mortality set	N=20	LR-Firth	0.055 (0.042-0.106)	0.047 (0.039-0.082)	0.018 (0.016-0.026)	0.492 (0.485-0.496)	0.344 (0.344-0.344)	0.064 (0.058-0.072)	0.000 (0.000-0.000)	0.001 (0.000-0.001)	0.003 (0.003-0.005)
Medium mortality set	N=50	LR-Firth	0.052 (0.040-0.107)	0.045 (0.037-0.083)	0.017 (0.015-0.024)	0.512 (0.509-0.514)	0.344 (0.344-0.344)	0.059 (0.054-0.066)	0.000 (0.000-0.000)	0.001 (0.000-0.001)	0.003 (0.002-0.005)
Medium mortality set	N=100	LR-Firth	0.050 (0.039-0.087)	0.044 (0.036-0.068)	0.016 (0.015-0.021)	0.511 (0.508-0.516)	0.350 (0.350-0.350)	0.054 (0.053-0.056)	0.000 (0.000-0.000)	0.001 (0.000-0.001)	0.003 (0.002-0.004)
Medium mortality set	N=10	LR-Firth 5% trim.	0.064 (0.045-0.090)	0.051 (0.042-0.076)	0.019 (0.016-0.024)	0.475 (0.474-0.475)	0.357 (0.357-0.357)	0.072 (0.065-0.082)	0.000 (0.000-0.001)	0.001 (0.001-0.001)	0.003 (0.001-0.005)
Medium mortality set	N=20	LR-Firth 5% trim.	0.059 (0.044-0.107)	0.051 (0.042-0.082)	0.021 (0.018-0.028)	0.517 (0.509-0.521)	0.361 (0.361-0.361)	0.073 (0.066-0.082)	0.000 (0.000-0.000)	0.001 (0.000-0.001)	0.004 (0.003-0.005)
Medium mortality set	N=50	LR-Firth 5% trim.	0.058 (0.045-0.114)	0.050 (0.042-0.087)	0.019 (0.016-0.026)	0.543 (0.540-0.547)	0.365 (0.365-0.365)	0.064 (0.059-0.072)	0.000 (0.000-0.000)	0.001 (0.000-0.001)	0.003 (0.002-0.005)
Medium mortality set	N=100	LR-Firth 5% trim.	0.058 (0.046-0.096)	0.050 (0.041-0.074)	0.018 (0.016-0.023)	0.545 (0.542-0.550)	0.375 (0.375-0.375)	0.059 (0.058-0.061)	0.000 (0.000-0.000)	0.001 (0.000-0.001)	0.003 (0.002-0.004)
Medium mortality set	N=10	LR-Firth 10% trim.	0.063 (0.043-0.079)	0.051 (0.042-0.069)	0.025 (0.021-0.030)	0.496 (0.491-0.500)	0.370 (0.370-0.370)	0.091 (0.085-0.102)	0.000 (0.000-0.001)	0.001 (0.001-0.001)	0.005 (0.003-0.006)
Medium mortality set	N=20	LR-Firth 10% trim.	0.060 (0.044-0.102)	0.052 (0.042-0.079)	0.023 (0.020-0.030)	0.525 (0.518-0.529)	0.368 (0.368-0.368)	0.078 (0.070-0.086)	0.000 (0.000-0.001)	0.001 (0.000-0.001)	0.004 (0.003-0.005)
Medium mortality set	N=50	LR-Firth 10% trim.	0.062 (0.048-0.111)	0.052 (0.044-0.086)	0.020 (0.017-0.027)	0.558 (0.555-0.564)	0.376 (0.376-0.376)	0.068 (0.063-0.075)	0.000 (0.000-0.000)	0.001 (0.001-0.001)	0.003 (0.002-0.005)
Medium mortality set	N=100	LR-Firth 10% trim.	0.061 (0.048-0.103)	0.051 (0.043-0.078)	0.018 (0.017-0.025)	0.556 (0.552-0.560)	0.382 (0.382-0.382)	0.061 (0.059-0.063)	0.000 (0.000-0.000)	0.001 (0.000-0.002)	0.003 (0.003-0.004)
Medium mortality set	N=10	LR-Firth 25% trim.	0.061 (0.042-0.071)	0.052 (0.043-0.067)	0.028 (0.025-0.032)	0.498 (0.493-0.504)	0.377 (0.377-0.377)	0.101 (0.093-0.113)	0.000 (0.000-0.000)	0.001 (0.001-0.001)	0.005 (0.004-0.006)
Medium mortality set	N=20	LR-Firth 25% trim.	0.060 (0.045-0.091)	0.054 (0.043-0.073)	0.024 (0.021-0.029)	0.534 (0.530-0.538)	0.379 (0.379-0.379)	0.084 (0.076-0.091)	0.000 (0.000-0.001)	0.001 (0.000-0.001)	0.005 (0.004-0.006)
Medium mortality set	N=50	LR-Firth 25% trim.	0.063 (0.050-0.101)	0.054 (0.046-0.081)	0.021 (0.018-0.026)	0.570 (0.565-0.574)	0.388 (0.388-0.388)	0.071 (0.066-0.078)	0.000 (0.000-0.000)	0.001 (0.001-0.001)	0.004 (0.002-0.005)
Medium mortality set	N=100	LR-Firth 25% trim.	0.063 (0.050-0.110)	0.053 (0.045-0.084)	0.019 (0.017-0.026)	0.568 (0.564-0.571)	0.391 (0.391-0.391)	0.062 (0.060-0.064)	0.000 (0.000-0.000)	0.001 (0.001-0.002)	0.003 (0.003-0.004)
Medium mortality set	N=10	LR, excl. 0-deaths	0.045 (0.031-0.067)	0.040 (0.032-0.062)	0.025 (0.022-0.033)	0.395 (0.392-0.398)	0.308 (0.308-0.308)	0.089 (0.080-0.100)	0.000 (0.000-0.000)	0.000 (0.000-0.001)	0.005 (0.003-0.007)
Medium mortality set	N=20	LR, excl. 0-deaths	0.035 (0.025-0.074)	0.035 (0.028-0.063)	0.024 (0.020-0.035)	0.397 (0.392-0.400)	0.287 (0.287-0.287)	0.078 (0.072-0.087)	0.000 (0.000-0.000)	0.001 (0.000-0.001)	0.005 (0.003-0.006)
Medium mortality set	N=50	LR, excl. 0-deaths	0.030 (0.021-0.069)	0.031 (0.026-0.062)	0.021 (0.019-0.033)	0.402 (0.399-0.406)	0.281 (0.281-0.281)	0.068 (0.063-0.075)	0.000 (0.000-0.000)	0.000 (0.000-0.001)	0.004 (0.003-0.007)
Medium mortality set	N=100	LR, excl. 0-deaths	0.030 (0.023-0.056)	0.031 (0.026-0.051)	0.021 (0.019-0.029)	0.408 (0.404-0.413)	0.291 (0.291-0.291)	0.064 (0.061-0.065)	0.000 (0.000-0.000)	0.000 (0.000-0.001)	0.004 (0.003-0.006)
Medium mortality set	N=10	LR 5% trim., excl. 0-deaths	0.045 (0.031-0.067)	0.040 (0.032-0.062)	0.025 (0.022-0.033)	0.395 (0.392-0.398)	0.308 (0.308-0.308)	0.089 (0.080-0.100)	0.000 (0.000-0.000)	0.000 (0.000-0.001)	0.005 (0.003-0.007)
Medium mortality set	N=20	LR 5% trim., excl. 0-deaths	0.040 (0.029-0.077)	0.039 (0.031-0.065)	0.028 (0.025-0.039)	0.430 (0.423-0.436)	0.308 (0.308-0.308)	0.091 (0.085-0.098)	0.000 (0.000-0.000)	0.001 (0.000-0.001)	0.006 (0.004-0.008)
Medium mortality set	N=50	LR 5% trim., excl. 0-deaths	0.036 (0.026-0.077)	0.036 (0.030-0.067)	0.024 (0.022-0.036)	0.441 (0.437-0.447)	0.306 (0.306-0.306)	0.077 (0.072-0.083)	0.000 (0.000-0.000)	0.001 (0.000-0.001)	0.005 (0.003-0.008)
Medium mortality set	N=100	LR 5% trim., excl. 0-deaths	0.038 (0.029-0.065)	0.038 (0.031-0.057)	0.025 (0.022-0.033)	0.454 (0.450-0.459)	0.322 (0.322-0.322)	0.072 (0.069-0.075)	0.000 (0.000-0.000)	0.001 (0.000-0.001)	0.005 (0.004-0.006)
Medium mortality set	N=10	LR 10% trim., excl. 0-deaths	0.046 (0.030-0.060)	0.042 (0.034-0.059)	0.034 (0.029-0.042)	0.423 (0.421-0.427)	0.326 (0.326-0.326)	0.114 (0.107-0.128)	0.000 (0.000-0.000)	0.001 (0.000-0.001)	0.007 (0.005-0.010)
Medium mortality set	N=20	LR 10% trim., excl. 0-deaths	0.041 (0.030-0.074)	0.040 (0.032-0.064)	0.031 (0.027-0.041)	0.443 (0.437-0.446)	0.319 (0.319-0.319)	0.099 (0.093-0.107)	0.000 (0.000-0.000)	0.001 (0.000-0.001)	0.007 (0.005-0.008)
Medium mortality set	N=50	LR 10% trim., excl. 0-deaths	0.040 (0.030-0.078)	0.039 (0.033-0.068)	0.027 (0.024-0.037)	0.465 (0.460-0.472)	0.321 (0.321-0.321)	0.085 (0.081-0.090)	0.000 (0.000-0.000)	0.001 (0.000-0.001)	0.005 (0.004-0.008)
Medium mortality set	N=100	LR 10% trim., excl. 0-deaths	0.041 (0.032-0.072)	0.040 (0.033-0.062)	0.026 (0.023-0.035)	0.474 (0.470-0.479)	0.335 (0.335-0.335)	0.077 (0.074-0.079)	0.000 (0.000-0.000)	0.001 (0.000-0.001)	0.005 (0.004-0.007)
Medium mortality set	N=10	LR 25% trim., excl. 0-deaths	0.045 (0.030-0.055)	0.044 (0.035-0.057)	0.040 (0.034-0.046)	0.428 (0.424-0.433)	0.333 (0.333-0.333)	0.130 (0.120-0.144)	0.000 (0.000-0.000)	0.001 (0.000-0.001)	0.008 (0.006-0.011)
Medium mortality set	N=20	LR 25% trim., excl. 0-deaths	0.043 (0.031-0.069)	0.044 (0.035-0.062)	0.035 (0.030-0.042)	0.461 (0.454-0.466)	0.336 (0.336-0.336)	0.109 (0.101-0.117)	0.000 (0.000-0.000)	0.001 (0.000-0.001)	0.007 (0.005-0.009)
Medium mortality set	N=50	LR 25% trim., excl. 0-deaths	0.043 (0.033-0.075)	0.043 (0.036-0.067)	0.029 (0.026-0.038)	0.487 (0.481-0.494)	0.339 (0.339-0.339)	0.092 (0.088-0.097)	0.000 (0.000-0.000)	0.001 (0.000-0.001)	0.006 (0.004-0.008)
Medium mortality set	N=100	LR 25% trim., excl. 0-deaths	0.045 (0.036-0.082)	0.044 (0.037-0.069)	0.028 (0.025-0.038)	0.497 (0.492-0.503)	0.354 (0.354-0.354)	0.082 (0.079-0.084)	0.000 (0.000-0.000)	0.001 (0.000-0.001)	0.006 (0.005-0.007)
Medium mortality set	N=10	LR-Firth, excl. 0-deaths	0.065 (0.046-0.090)	0.052 (0.042-0.077)	0.017 (0.014-0.022)	0.480 (0.477-0.483)	0.360 (0.360-0.360)	0.065 (0.058-0.074)	0.000 (0.000-0.001)	0.001 (0.001-0.001)	0.003 (0.002-0.005)
Medium mortality set	N=20	LR-Firth, excl. 0-deaths	0.056 (0.043-0.107)	0.048 (0.040-0.082)	0.016 (0.014-0.024)	0.498 (0.490-0.502)	0.348 (0.348-0.348)	0.057 (0.052-0.064)	0.000 (0.000-0.000)	0.001 (0.000-0.001)	0.003 (0.002-0.004)
Medium mortality set	N=50	LR-Firth, excl. 0-deaths	0.053 (0.041-0.109)	0.046 (0.038-0.084)	0.015 (0.013-0.023)	0.521 (0.517-0.526)	0.350 (0.350-0.350)	0.051 (0.047-0.056)	0.000 (0.000-0.000)	0.001 (0.000-0.001)	0.003 (0.002-0.004)
Medium mortality set	N=100	LR-Firth, excl. 0-deaths	0.052 (0.040-0.088)	0.045 (0.037-0.069)	0.015 (0.013-0.020)	0.519 (0.516-0.523)	0.356 (0.356-0.356)	0.046 (0.045-0.048)	0.000 (0.000-0.000)	0.001 (0.000-0.001)	0.003 (0.002-0.003)
Medium mortality set	N=10	LR-Firth 5% trim., excl. 0-deaths	0.065 (0.046-0.090)	0.052 (0.042-0.077)	0.017 (0.014-0.022)	0.480 (0.477-0.483)	0.360 (0.360-0.360)	0.065 (0.058-0.074)	0.000 (0.000-0.001)	0.001 (0.001-0.001)	0.003 (0.002-0.005)
Medium mortality set	N=20	LR-Firth 5% trim., excl. 0-deaths	0.060 (0.045-0.108)	0.051 (0.042-0.083)	0.019 (0.016-0.027)	0.519 (0.512-0.523)	0.364 (0.364-0.364)	0.065 (0.058-0.074)	0.000 (0.000-0.000)	0.001 (0.000-0.001)	0.004 (0.003-0.005)
Medium mortality set	N=50	LR-Firth 5% trim., excl. 0-deaths	0.059 (0.046-0.114)	0.051 (0.042-0.088)	0.017 (0.015-0.025)	0.546 (0.543-0.550)	0.368 (0.368-0.368)	0.056 (0.051-0.062)	0.000 (0.000-0.000)	0.001 (0.000-0.001)	0.003 (0.002-0.005)
Medium mortality set	N=100	LR-Firth 5% trim., excl. 0-deaths	0.059 (0.046-0.096)	0.050 (0.042-0.074)	0.016 (0.014-0.021)	0.547 (0.544-0.552)	0.376 (0.376-0.376)	0.051 (0.049-0.053)	0.000 (0.000-0.000)	0.001 (0.000-0.001)	0.003 (0.002-0.004)
Medium mortality set	N=10	LR-Firth 10% trim., excl. 0-deaths	0.064 (0.043-0.080)	0.052 (0.042-0.070)	0.024 (0.020-0.028)	0.499 (0.493-0.502)	0.372 (0.372-0.372)	0.084 (0.077-0.094)	0.000 (0.000-0.001)	0.001 (0.001-0.001)	0.004 (0.003-0.006)
Medium mortality set	N=20	LR-Firth 10% trim., excl. 0-deaths	0.061 (0.045-0.103)	0.052 (0.042-0.079)	0.021 (0.018-0.028)	0.527 (0.520-0.531)	0.370 (0.370-0.370)	0.070 (0.063-0.077)	0.000 (0.000-0.001)	0.001 (0.000-0.001)	0.004 (0.003-0.005)
Medium mortality set	N=50	LR-Firth 10% trim., excl. 0-deaths	0.062 (0.049-0.112)	0.053 (0.044-0.086)	0.018 (0.016-0.025)	0.561 (0.556-0.566)	0.378 (0.378-0.378)	0.059 (0.055-0.065)	0.000 (0.000-0.000)	0.001 (0.001-0.001)	0.003 (0.002-0.005)
Medium mortality set	N=100	LR-Firth 10% trim., excl. 0-deaths	0.061 (0.048-0.104)	0.052 (0.043-0.079)	0.017 (0.015-0.023)	0.558 (0.555-0.562)	0.383 (0.383-0.383)	0.052 (0.050-0.054)	0.000 (0.000-0.000)	0.001 (0.000-0.002)	0.003 (0.002-0.004)
Medium mortality set	N=10	LR-Firth 25%, excl. 0-deaths	0.062 (0.042-0.071)	0.053 (0.043-0.068)	0.027 (0.023-0.030)	0.501 (0.495-0.506)	0.379 (0.379-0.379)	0.094 (0.085-0.105)	0.000 (0.000-0.000)	0.001 (0.001-0.001)	0.005 (0.003-0.007)
Medium mortality set	N=20	LR-Firth 25%, excl. 0-deaths	0.061 (0.045-0.091)	0.054 (0.044-0.074)	0.023 (0.020-0.027)	0.537 (0.532-0.541)	0.381 (0.381-0.381)	0.076 (0.068-0.083)	0.000 (0.000-0.001)	0.001 (0.000-0.001)	0.004 (0.003-0.005)
Medium mortality set	N=50	LR-Firth 25%, excl. 0-deaths	0.064 (0.050-0.102)	0.055 (0.046-0.082)	0.019 (0.017-0.025)	0.571 (0.567-0.576)	0.390 (0.390-0.390)	0.062 (0.058-0.068)	0.000 (0.000-0.000)	0.001 (0.001-0.001)	0.003 (0.002-0.005)
Medium mortality set	N=100	LR-Firth 25%, excl. 0-deaths	0.063 (0.050-0.111)	0.053 (0.045-0.084)	0.017 (0.015-0.024)	0.569 (0.566-0.572)	0.392 (0.392-0.392)	0.054 (0.051-0.055)	0.000 (0.000-0.000)	0.001 (0.001-0.002)	0.003 (0.002-0.004)
High mortality set	N=10	OE	0.079 (0.029-0.164)	0.063 (0.037-0.124)	0.050 (0.041-0.068)	0.788 (0.785-0.792)	0.577 (0.577-0.577)	0.213 (0.175-0.243)	0.000 (0.000-0.000)	0.001 (0.000-0.001)	0.008 (0.006-0.010)
High mortality set	N=20	OE	0.065 (0.038-0.107)	0.062 (0.040-0.091)	0.049 (0.042-0.061)	0.760 (0.756-0.762)	0.558 (0.558-0.558)	0.193 (0.171-0.209)	0.000 (0.000-0.000)	0.000 (0.000-0.001)	0.008 (0.006-0.010)
High mortality set	N=50	OE	0.063 (0.042-0.119)	0.060 (0.045-0.101)	0.048 (0.043-0.060)	0.748 (0.743-0.757)	0.549 (0.549-0.549)	0.182 (0.173-0.187)	0.000 (0.000-0.000)	0.000 (0.000-0.001)	0.007 (0.006-0.008)
High mortality set	N=100	OE	0.065 (0.045-0.157)	0.060 (0.045-0.121)	0.048 (0.043-0.067)	0.742 (0.739-0.746)	0.547 (0.547-0.547)	0.173 (0.169-0.179)	0.000 (0.000-0.000)	0.001 (0.000-0.001)	0.006 (0.005-0.007)
High mortality set	N=10	OE-Faris	0.116 (0.049-0.228)	0.080 (0.049-0.153)	0.052 (0.043-0.071)	0.849 (0.848-0.851)	0.630 (0.630-0.630)	0.220 (0.181-0.250)	0.000 (0.000-0.000)	0.001 (0.000-0.002)	0.008 (0.006-0.011)
High mortality set	N=20	OE-Faris	0.081 (0.049-0.131)	0.071 (0.047-0.103)	0.051 (0.044-0.062)	0.794 (0.790-0.797)	0.586 (0.586-0.586)	0.197 (0.174-0.213)	0.000 (0.000-0.000)	0.000 (0.000-0.001)	0.008 (0.006-0.011)
High mortality set	N=50	OE-Faris	0.070 (0.048-0.130)	0.064 (0.047-0.106)	0.049 (0.043-0.061)	0.765 (0.761-0.772)	0.560 (0.560-0.560)	0.183 (0.174-0.189)	0.000 (0.000-0.000)	0.000 (0.000-0.001)	0.007 (0.006-0.008)
High mortality set	N=100	OE-Faris	0.068 (0.047-0.162)	0.061 (0.046-0.124)	0.048 (0.043-0.067)	0.750 (0.744-0.754)	0.553 (0.553-0.553)	0.174 (0.169-0.179)	0.000 (0.000-0.000)	0.001 (0.000-0.001)	0.006 (0.005-0.007)
High mortality set	N=10	LR	0.054 (0.033-0.087)	0.048 (0.034-0.078)	0.040 (0.033-0.053)	0.581 (0.576-0.588)	0.456 (0.456-0.456)	0.169 (0.160-0.185)	0.000 (0.000-0.000)	0.000 (0.000-0.000)	0.005 (0.004-0.007)
High mortality set	N=20	LR	0.045 (0.032-0.102)	0.045 (0.034-0.087)	0.038 (0.033-0.053)	0.600 (0.598-0.602)	0.458 (0.458-0.458)	0.153 (0.145-0.165)	0.000 (0.000-0.000)	0.000 (0.000-0.000)	0.006 (0.005-0.007)
High mortality set	N=50	LR	0.041 (0.028-0.100)	0.041 (0.031-0.085)	0.036 (0.033-0.053)	0.622 (0.618-0.626)	0.453 (0.453-0.453)	0.143 (0.138-0.149)	0.000 (0.000-0.000)	0.000 (0.000-0.000)	0.005 (0.004-0.008)
High mortality set	N=100	LR	0.040 (0.029-0.079)	0.041 (0.033-0.071)	0.036 (0.033-0.048)	0.645 (0.641-0.650)	0.466 (0.466-0.466)	0.141 (0.138-0.144)	0.000 (0.000-0.000)	0.000 (0.000-0.000)	0.005 (0.003-0.007)
High mortality set	N=10	LR 5% trim.	0.054 (0.033-0.087)	0.048 (0.034-0.078)	0.040 (0.033-0.053)	0.581 (0.576-0.588)	0.456 (0.456-0.456)	0.169 (0.160-0.185)	0.000 (0.000-0.000)	0.000 (0.000-0.000)	0.005 (0.004-0.007)
High mortality set	N=20	LR 5% trim.	0.048 (0.034-0.100)	0.047 (0.036-0.086)	0.041 (0.036-0.055)	0.623 (0.623-0.624)	0.474 (0.474-0.474)	0.162 (0.156-0.176)	0.000 (0.000-0.000)	0.000 (0.000-0.000)	0.006 (0.005-0.007)
High mortality set	N=50	LR 5% trim.	0.045 (0.032-0.104)	0.045 (0.034-0.088)	0.038 (0.035-0.054)	0.646 (0.644-0.648)	0.473 (0.473-0.473)	0.149 (0.145-0.154)	0.000 (0.000-0.000)	0.000 (0.000-0.000)	0.005 (0.004-0.008)
High mortality set	N=100	LR 5% trim.	0.046 (0.034-0.083)	0.046 (0.037-0.074)	0.039 (0.035-0.049)	0.674 (0.671-0.680)	0.489 (0.489-0.489)	0.148 (0.144-0.152)	0.000 (0.000-0.000)	0.000 (0.000-0.001)	0.005 (0.004-0.007)
High mortality set	N=10	LR 10% trim.	0.053 (0.036-0.075)	0.048 (0.036-0.069)	0.046 (0.038-0.058)	0.601 (0.596-0.607)	0.471 (0.471-0.471)	0.188 (0.178-0.205)	0.000 (0.000-0.000)	0.000 (0.000-0.000)	0.006 (0.005-0.008)
High mortality set	N=20	LR 10% trim.	0.049 (0.036-0.095)	0.048 (0.037-0.082)	0.043 (0.038-0.056)	0.634 (0.633-0.635)	0.483 (0.483-0.483)	0.168 (0.161-0.182)	0.000 (0.000-0.000)	0.000 (0.000-0.000)	0.006 (0.005-0.008)
High mortality set	N=50	LR 10% trim.	0.048 (0.035-0.101)	0.047 (0.036-0.085)	0.040 (0.036-0.055)	0.661 (0.659-0.663)	0.483 (0.483-0.483)	0.155 (0.152-0.160)	0.000 (0.000-0.000)	0.000 (0.000-0.000)	0.006 (0.004-0.009)
High mortality set	N=100	LR 10% trim.	0.049 (0.036-0.089)	0.047 (0.038-0.077)	0.040 (0.036-0.050)	0.686 (0.682-0.691)	0.498 (0.498-0.498)	0.151 (0.147-0.156)	0.000 (0.000-0.000)	0.000 (0.000-0.001)	0.005 (0.004-0.007)
High mortality set	N=10	LR 25% trim.	0.052 (0.035-0.066)	0.048 (0.037-0.064)	0.050 (0.042-0.059)	0.598 (0.593-0.602)	0.469 (0.469-0.469)	0.201 (0.187-0.216)	0.000 (0.000-0.000)	0.000 (0.000-0.000)	0.007 (0.006-0.008)
High mortality set	N=20	LR 25% trim.	0.048 (0.037-0.082)	0.049 (0.039-0.074)	0.046 (0.041-0.055)	0.638 (0.635-0.641)	0.491 (0.491-0.491)	0.176 (0.168-0.190)	0.000 (0.000-0.000)	0.000 (0.000-0.000)	0.007 (0.006-0.008)
High mortality set	N=50	LR 25% trim.	0.049 (0.036-0.090)	0.049 (0.039-0.079)	0.042 (0.038-0.054)	0.673 (0.671-0.675)	0.494 (0.494-0.494)	0.161 (0.158-0.165)	0.000 (0.000-0.000)	0.000 (0.000-0.000)	0.006 (0.005-0.008)
High mortality set	N=100	LR 25% trim.	0.051 (0.039-0.095)	0.049 (0.041-0.081)	0.041 (0.037-0.052)	0.699 (0.696-0.704)	0.512 (0.512-0.512)	0.155 (0.150-0.158)	0.000 (0.000-0.000)	0.000 (0.000-0.001)	0.006 (0.004-0.007)
High mortality set	N=10	LR-Firth	0.069 (0.044-0.106)	0.056 (0.041-0.088)	0.032 (0.026-0.043)	0.636 (0.631-0.643)	0.495 (0.495-0.495)	0.145 (0.138-0.158)	0.000 (0.000-0.000)	0.000 (0.000-0.000)	0.004 (0.002-0.005)
High mortality set	N=20	LR-Firth	0.060 (0.044-0.127)	0.054 (0.042-0.102)	0.031 (0.027-0.044)	0.662 (0.660-0.664)	0.502 (0.502-0.502)	0.131 (0.124-0.141)	0.000 (0.000-0.000)	0.000 (0.000-0.000)	0.004 (0.003-0.005)
High mortality set	N=50	LR-Firth	0.057 (0.041-0.131)	0.052 (0.040-0.102)	0.030 (0.027-0.044)	0.690 (0.687-0.693)	0.500 (0.500-0.500)	0.125 (0.120-0.130)	0.000 (0.000-0.000)	0.000 (0.000-0.001)	0.004 (0.003-0.007)
High mortality set	N=100	LR-Firth	0.056 (0.042-0.105)	0.050 (0.041-0.085)	0.030 (0.027-0.039)	0.708 (0.704-0.715)	0.508 (0.508-0.508)	0.121 (0.118-0.123)	0.000 (0.000-0.000)	0.000 (0.000-0.001)	0.004 (0.003-0.005)
High mortality set	N=10	LR-Firth 5% trim.	0.069 (0.044-0.106)	0.056 (0.041-0.088)	0.032 (0.026-0.043)	0.636 (0.631-0.643)	0.495 (0.495-0.495)	0.145 (0.138-0.158)	0.000 (0.000-0.000)	0.000 (0.000-0.000)	0.004 (0.002-0.005)
High mortality set	N=20	LR-Firth 5% trim.	0.062 (0.045-0.123)	0.056 (0.044-0.097)	0.033 (0.029-0.045)	0.678 (0.676-0.680)	0.512 (0.512-0.512)	0.139 (0.131-0.152)	0.000 (0.000-0.000)	0.000 (0.000-0.000)	0.005 (0.004-0.006)
High mortality set	N=50	LR-Firth 5% trim.	0.062 (0.045-0.132)	0.055 (0.044-0.103)	0.032 (0.028-0.045)	0.709 (0.707-0.711)	0.517 (0.517-0.517)	0.130 (0.126-0.135)	0.000 (0.000-0.000)	0.000 (0.000-0.001)	0.004 (0.003-0.007)
High mortality set	N=100	LR-Firth 5% trim.	0.062 (0.047-0.108)	0.055 (0.044-0.085)	0.031 (0.028-0.040)	0.728 (0.723-0.734)	0.528 (0.528-0.528)	0.126 (0.123-0.128)	0.000 (0.000-0.000)	0.000 (0.000-0.001)	0.004 (0.003-0.005)
High mortality set	N=10	LR-Firth 10% trim.	0.065 (0.044-0.089)	0.054 (0.042-0.077)	0.037 (0.031-0.047)	0.648 (0.644-0.650)	0.506 (0.506-0.506)	0.161 (0.152-0.176)	0.000 (0.000-0.000)	0.000 (0.000-0.000)	0.005 (0.004-0.006)
High mortality set	N=20	LR-Firth 10% trim.	0.062 (0.045-0.114)	0.056 (0.043-0.091)	0.035 (0.030-0.046)	0.683 (0.683-0.684)	0.516 (0.516-0.516)	0.144 (0.137-0.157)	0.000 (0.000-0.000)	0.000 (0.000-0.000)	0.005 (0.004-0.006)
High mortality set	N=50	LR-Firth 10% trim.	0.064 (0.048-0.126)	0.056 (0.045-0.099)	0.033 (0.029-0.045)	0.718 (0.718-0.719)	0.524 (0.524-0.524)	0.134 (0.131-0.139)	0.000 (0.000-0.000)	0.000 (0.000-0.001)	0.004 (0.003-0.007)
High mortality set	N=100	LR-Firth 10% trim.	0.063 (0.048-0.114)	0.055 (0.045-0.089)	0.032 (0.029-0.041)	0.733 (0.729-0.739)	0.533 (0.533-0.533)	0.128 (0.125-0.130)	0.000 (0.000-0.000)	0.000 (0.000-0.001)	0.004 (0.003-0.005)
High mortality set	N=10	LR-Firth 25% trim.	0.063 (0.041-0.078)	0.054 (0.042-0.070)	0.040 (0.034-0.048)	0.643 (0.642-0.644)	0.504 (0.504-0.504)	0.173 (0.160-0.185)	0.000 (0.000-0.000)	0.000 (0.000-0.000)	0.005 (0.004-0.006)
High mortality set	N=20	LR-Firth 25% trim.	0.061 (0.047-0.096)	0.056 (0.044-0.082)	0.036 (0.032-0.044)	0.683 (0.682-0.683)	0.522 (0.522-0.522)	0.150 (0.141-0.162)	0.000 (0.000-0.000)	0.000 (0.000-0.000)	0.005 (0.005-0.006)
High mortality set	N=50	LR-Firth 25% trim.	0.063 (0.048-0.111)	0.057 (0.047-0.090)	0.034 (0.030-0.043)	0.721 (0.719-0.722)	0.530 (0.530-0.530)	0.137 (0.133-0.142)	0.000 (0.000-0.000)	0.000 (0.000-0.001)	0.004 (0.003-0.006)
High mortality set	N=100	LR-Firth 25% trim.	0.063 (0.050-0.118)	0.056 (0.046-0.092)	0.032 (0.029-0.042)	0.737 (0.734-0.743)	0.539 (0.539-0.539)	0.129 (0.126-0.131)	0.000 (0.000-0.000)	0.000 (0.000-0.001)	0.004 (0.003-0.005)
High mortality set	N=10	LR, excl. 0-deaths	0.054 (0.033-0.087)	0.048 (0.034-0.078)	0.040 (0.033-0.053)	0.581 (0.576-0.588)	0.456 (0.456-0.456)	0.169 (0.160-0.185)	0.000 (0.000-0.000)	0.000 (0.000-0.000)	0.005 (0.004-0.007)
High mortality set	N=20	LR, excl. 0-deaths	0.046 (0.032-0.102)	0.045 (0.034-0.087)	0.038 (0.033-0.053)	0.601 (0.598-0.602)	0.458 (0.458-0.458)	0.153 (0.145-0.165)	0.000 (0.000-0.000)	0.000 (0.000-0.000)	0.006 (0.005-0.007)
High mortality set	N=50	LR, excl. 0-deaths	0.041 (0.028-0.100)	0.041 (0.031-0.085)	0.036 (0.033-0.053)	0.622 (0.618-0.626)	0.453 (0.453-0.453)	0.144 (0.138-0.150)	0.000 (0.000-0.000)	0.000 (0.000-0.000)	0.005 (0.004-0.008)
High mortality set	N=100	LR, excl. 0-deaths	0.040 (0.029-0.079)	0.041 (0.033-0.071)	0.036 (0.033-0.048)	0.646 (0.642-0.651)	0.467 (0.467-0.467)	0.141 (0.138-0.144)	0.000 (0.000-0.000)	0.000 (0.000-0.000)	0.005 (0.003-0.007)
High mortality set	N=10	LR 5% trim., excl. 0-deaths	0.054 (0.033-0.087)	0.048 (0.034-0.078)	0.040 (0.033-0.053)	0.581 (0.576-0.588)	0.456 (0.456-0.456)	0.169 (0.160-0.185)	0.000 (0.000-0.000)	0.000 (0.000-0.000)	0.005 (0.004-0.007)
High mortality set	N=20	LR 5% trim., excl. 0-deaths	0.048 (0.034-0.100)	0.047 (0.036-0.086)	0.041 (0.036-0.055)	0.624 (0.623-0.624)	0.474 (0.474-0.474)	0.162 (0.156-0.176)	0.000 (0.000-0.000)	0.000 (0.000-0.000)	0.006 (0.005-0.008)
High mortality set	N=50	LR 5% trim., excl. 0-deaths	0.045 (0.032-0.104)	0.045 (0.034-0.088)	0.038 (0.035-0.054)	0.647 (0.644-0.649)	0.473 (0.473-0.473)	0.149 (0.145-0.154)	0.000 (0.000-0.000)	0.000 (0.000-0.000)	0.005 (0.004-0.009)
High mortality set	N=100	LR 5% trim., excl. 0-deaths	0.047 (0.035-0.083)	0.046 (0.037-0.074)	0.039 (0.035-0.049)	0.675 (0.672-0.681)	0.489 (0.489-0.489)	0.148 (0.144-0.152)	0.000 (0.000-0.000)	0.000 (0.000-0.001)	0.005 (0.004-0.007)
High mortality set	N=10	LR 10% trim., excl. 0-deaths	0.054 (0.036-0.075)	0.048 (0.036-0.069)	0.046 (0.038-0.058)	0.601 (0.596-0.607)	0.471 (0.471-0.471)	0.188 (0.178-0.205)	0.000 (0.000-0.000)	0.000 (0.000-0.000)	0.006 (0.005-0.008)
High mortality set	N=20	LR 10% trim., excl. 0-deaths	0.049 (0.036-0.095)	0.048 (0.037-0.082)	0.043 (0.038-0.056)	0.634 (0.634-0.635)	0.483 (0.483-0.483)	0.168 (0.161-0.182)	0.000 (0.000-0.000)	0.000 (0.000-0.000)	0.006 (0.005-0.008)
High mortality set	N=50	LR 10% trim., excl. 0-deaths	0.048 (0.035-0.101)	0.047 (0.036-0.086)	0.040 (0.036-0.055)	0.662 (0.660-0.663)	0.484 (0.484-0.484)	0.155 (0.152-0.160)	0.000 (0.000-0.000)	0.000 (0.000-0.000)	0.006 (0.004-0.009)
High mortality set	N=100	LR 10% trim., excl. 0-deaths	0.049 (0.036-0.089)	0.047 (0.038-0.077)	0.040 (0.036-0.050)	0.687 (0.684-0.692)	0.498 (0.498-0.498)	0.152 (0.147-0.156)	0.000 (0.000-0.000)	0.000 (0.000-0.001)	0.005 (0.004-0.007)
High mortality set	N=10	LR 25% trim., excl. 0-deaths	0.052 (0.035-0.066)	0.048 (0.037-0.064)	0.050 (0.042-0.059)	0.598 (0.594-0.602)	0.469 (0.469-0.469)	0.201 (0.187-0.216)	0.000 (0.000-0.000)	0.000 (0.000-0.000)	0.007 (0.006-0.008)
High mortality set	N=20	LR 25% trim., excl. 0-deaths	0.048 (0.037-0.082)	0.049 (0.039-0.074)	0.046 (0.041-0.055)	0.639 (0.636-0.641)	0.491 (0.491-0.491)	0.177 (0.168-0.190)	0.000 (0.000-0.000)	0.000 (0.000-0.000)	0.007 (0.006-0.008)
High mortality set	N=50	LR 25% trim., excl. 0-deaths	0.049 (0.036-0.090)	0.049 (0.039-0.079)	0.042 (0.038-0.054)	0.673 (0.672-0.676)	0.495 (0.495-0.495)	0.161 (0.159-0.165)	0.000 (0.000-0.000)	0.000 (0.000-0.000)	0.006 (0.005-0.008)
High mortality set	N=100	LR 25% trim., excl. 0-deaths	0.051 (0.039-0.095)	0.050 (0.041-0.081)	0.041 (0.038-0.052)	0.700 (0.697-0.705)	0.512 (0.512-0.512)	0.155 (0.150-0.159)	0.000 (0.000-0.000)	0.000 (0.000-0.001)	0.006 (0.004-0.007)
High mortality set	N=10	LR-Firth, excl. 0-deaths	0.069 (0.044-0.106)	0.056 (0.041-0.088)	0.032 (0.026-0.043)	0.636 (0.631-0.643)	0.495 (0.495-0.495)	0.145 (0.138-0.158)	0.000 (0.000-0.000)	0.000 (0.000-0.000)	0.004 (0.002-0.005)
High mortality set	N=20	LR-Firth, excl. 0-deaths	0.060 (0.044-0.127)	0.054 (0.042-0.102)	0.031 (0.027-0.044)	0.662 (0.660-0.664)	0.502 (0.502-0.502)	0.131 (0.124-0.141)	0.000 (0.000-0.000)	0.000 (0.000-0.000)	0.004 (0.003-0.005)
High mortality set	N=50	LR-Firth, excl. 0-deaths	0.058 (0.041-0.131)	0.052 (0.040-0.102)	0.030 (0.027-0.044)	0.691 (0.687-0.693)	0.500 (0.500-0.500)	0.125 (0.120-0.130)	0.000 (0.000-0.000)	0.000 (0.000-0.001)	0.004 (0.003-0.007)
High mortality set	N=100	LR-Firth, excl. 0-deaths	0.056 (0.042-0.105)	0.050 (0.041-0.085)	0.030 (0.027-0.039)	0.708 (0.704-0.715)	0.508 (0.508-0.508)	0.120 (0.118-0.123)	0.000 (0.000-0.000)	0.000 (0.000-0.001)	0.004 (0.003-0.005)
High mortality set	N=10	LR-Firth 5% trim., excl. 0-deaths	0.069 (0.044-0.106)	0.056 (0.041-0.088)	0.032 (0.026-0.043)	0.636 (0.631-0.643)	0.495 (0.495-0.495)	0.145 (0.138-0.158)	0.000 (0.000-0.000)	0.000 (0.000-0.000)	0.004 (0.002-0.005)
High mortality set	N=20	LR-Firth 5% trim., excl. 0-deaths	0.062 (0.045-0.123)	0.056 (0.044-0.097)	0.033 (0.029-0.045)	0.678 (0.676-0.680)	0.512 (0.512-0.512)	0.138 (0.131-0.151)	0.000 (0.000-0.000)	0.000 (0.000-0.000)	0.005 (0.004-0.006)
High mortality set	N=50	LR-Firth 5% trim., excl. 0-deaths	0.062 (0.045-0.132)	0.055 (0.044-0.104)	0.032 (0.028-0.045)	0.709 (0.707-0.711)	0.517 (0.517-0.517)	0.130 (0.126-0.135)	0.000 (0.000-0.000)	0.000 (0.000-0.001)	0.004 (0.003-0.007)
High mortality set	N=100	LR-Firth 5% trim., excl. 0-deaths	0.062 (0.047-0.108)	0.055 (0.044-0.085)	0.031 (0.028-0.040)	0.728 (0.723-0.734)	0.528 (0.528-0.528)	0.125 (0.123-0.128)	0.000 (0.000-0.000)	0.000 (0.000-0.001)	0.004 (0.003-0.005)
High mortality set	N=10	LR-Firth 10% trim., excl. 0-deaths	0.065 (0.044-0.089)	0.054 (0.042-0.077)	0.037 (0.031-0.047)	0.648 (0.644-0.651)	0.506 (0.506-0.506)	0.161 (0.152-0.176)	0.000 (0.000-0.000)	0.000 (0.000-0.000)	0.005 (0.004-0.006)
High mortality set	N=20	LR-Firth 10% trim., excl. 0-deaths	0.062 (0.045-0.114)	0.056 (0.043-0.091)	0.035 (0.030-0.046)	0.684 (0.683-0.684)	0.516 (0.516-0.516)	0.144 (0.137-0.157)	0.000 (0.000-0.000)	0.000 (0.000-0.000)	0.005 (0.004-0.006)
High mortality set	N=50	LR-Firth 10% trim., excl. 0-deaths	0.064 (0.048-0.126)	0.056 (0.045-0.099)	0.033 (0.029-0.045)	0.718 (0.718-0.719)	0.524 (0.524-0.524)	0.134 (0.131-0.139)	0.000 (0.000-0.000)	0.000 (0.000-0.001)	0.004 (0.003-0.007)
High mortality set	N=100	LR-Firth 10% trim., excl. 0-deaths	0.063 (0.048-0.114)	0.055 (0.045-0.089)	0.032 (0.029-0.041)	0.733 (0.729-0.739)	0.533 (0.533-0.533)	0.127 (0.125-0.129)	0.000 (0.000-0.000)	0.000 (0.000-0.001)	0.004 (0.003-0.005)
High mortality set	N=10	LR-Firth 25%, excl. 0-deaths	0.063 (0.041-0.078)	0.054 (0.042-0.070)	0.040 (0.034-0.048)	0.643 (0.642-0.644)	0.504 (0.504-0.504)	0.173 (0.160-0.185)	0.000 (0.000-0.000)	0.000 (0.000-0.000)	0.005 (0.004-0.006)
High mortality set	N=20	LR-Firth 25%, excl. 0-deaths	0.061 (0.047-0.096)	0.056 (0.044-0.082)	0.036 (0.032-0.044)	0.683 (0.682-0.683)	0.522 (0.522-0.522)	0.149 (0.141-0.161)	0.000 (0.000-0.000)	0.000 (0.000-0.000)	0.005 (0.005-0.006)
High mortality set	N=50	LR-Firth 25%, excl. 0-deaths	0.063 (0.048-0.111)	0.057 (0.047-0.090)	0.034 (0.030-0.043)	0.721 (0.719-0.722)	0.530 (0.530-0.530)	0.136 (0.133-0.142)	0.000 (0.000-0.000)	0.000 (0.000-0.001)	0.004 (0.003-0.006)
High mortality set	N=100	LR-Firth 25%, excl. 0-deaths	0.063 (0.050-0.118)	0.056 (0.046-0.092)	0.032 (0.029-0.042)	0.737 (0.734-0.743)	0.539 (0.539-0.539)	0.129 (0.126-0.131)	0.000 (0.000-0.000)	0.000 (0.000-0.001)	0.004 (0.003-0.005)
